# Supplementary material for: Personalized Prediction of Acquired Resistance to EGFR-Targeted Inhibitors Using a Pathway-Based Machine Learning Approach
Source: PubMed Central journal article supplement (PMC6357167; doi:10.3390/cancers11010045), 2019-01-04

# Supplementary Materials: Personalized Prediction of Acquired Resistance to EGFR-Targeted Inhibitors Using a Pathway-Based Machine Learning Approach

Young Rae Kim, Yong Wan Kim, Suh Eun Lee, Hye Won Yang and Sung Young Kim

**Table S1.** Characteristics of individual studies.

| Drug      | Dataset  | Sample Size |    | Origin of Cancer<br>(Cell Lines)                      | Platform                                           |
|-----------|----------|-------------|----|-------------------------------------------------------|----------------------------------------------------|
|           |          | S           | AR |                                                       |                                                    |
| Gefitinib | GSE34228 | 26          | 26 | Lung cancer<br>(PC9)                                  | Agilent-014850 Whole Human Genome Microarray 4x44K |
|           | GSE10696 | 3           | 3  | Epidermoid carcinoma<br>(A431)                        | Affymetrix Human Genome U133 Plus 2.0              |
| Erlotinib | GSE62061 | 12          | 12 | Head and neck cancer<br>(Cal-27, SSC-25, FaDu, SQ20B) | Illumina HumanHT-12 V4.0 expression beadchip       |
|           | GSE49135 | 3           | 3  | Head and neck cancer<br>(HN5)                         | Illumina HumanHT-12 V4.0 expression beadchip       |
|           | GSE38310 | 3           | 6  | Lung cancer (HCC827, ER3, T15-2)                      | Illumina HumanHT-12 V3.0 expression beadchip       |
| Afatinib  | GSE62504 | 1           | 2  | Lung cancer<br>(HCC827)                               | Illumina HumanHT-12 V3.0 expression beadchip       |
|           | GSE75468 | 1           | 3  | Lung cancer *<br>(HCC827)                             | Illumina HumanHT-12 V4.0 expression beadchip       |
| Cetuximab | GSE21483 | 3           | 3  | Head and neck cancer<br>(SCC1)                        | Affymetrix Human Genome U133 Plus 2.0 Array        |

GEO, gene expression omnibus; GSE, gene expression series; S, sensitive; AR, acquired EGFR-TKI resistant; \* Lung Cancer Cells Derived from Tumor Xenograft Model.

**Table S2.** The performances of four penalized regression models.

| Model             | ACC   | precision | recall | F1    | MCC   | AUROC | BRIER |
|-------------------|-------|-----------|--------|-------|-------|-------|-------|
| Ridge             | 0.889 | 0.852     | 0.958  | 0.902 | 0.782 | 0.964 | 0.129 |
| Lasso             | 0.944 | 0.957     | 0.938  | 0.947 | 0.889 | 0.991 | 0.042 |
| Elastic Net       | 0.978 | 0.979     | 0.979  | 0.979 | 0.955 | 0.999 | 0.023 |
| EPSGO Elastic Net | 0.989 | 1.000     | 0.979  | 0.989 | 0.978 | 1.000 | 0.018 |

AUROC, area under curve of receiver operating characteristic; ACC, accuracy; MCC, Matthews correlation coefficient; EPSGO, Efficient Parameter Selection via Global Optimization algorithm.

**Table S3.** Pathways with non-zero coefficients using LOOCV and LOSOCV.

| No. | Pathways with nonzero coefficients ( $n=55$ )   | Non-zero coefficients | Source | Pathways with non-zero coefficients using LOSOCV ( $n=21$ ) |
|-----|-------------------------------------------------|-----------------------|--------|-------------------------------------------------------------|
| 1   | REGULATION OF P38-ALPHA AND P38-BETA            | -1.766503612          | PID    | TRUE                                                        |
| 2   | PROTEOGLYCAN SYNDECAN-MEDIATED SIGNALING EVENTS | -1.136281573          | PID    | TRUE                                                        |

|    |                                                                                 |              |          |       |
|----|---------------------------------------------------------------------------------|--------------|----------|-------|
| 3  | EPHRIN B REVERSE SIGNALING                                                      | -0.721317963 | PID      | FALSE |
| 4  | CELL TO CELL ADHESION SIGNALING                                                 | -0.477917154 | BioCarta | FALSE |
| 5  | ERK1-ERK2 MAPK SIGNALING PATHWAY                                                | -0.199265242 | BioCarta | FALSE |
| 6  | INTEGRIN SIGNALING PATHWAY                                                      | -0.128014066 | BioCarta | FALSE |
| 7  | HEDGEHOG SIGNALING PATHWAY                                                      | -0.005571133 | KEGG     | FALSE |
| 8  | TELOMERES TELOMERASE CELLULAR AGING AND IMMORTALITY                             | 0.011199268  | BioCarta | FALSE |
| 9  | ROLE OF EGF RECEPTOR TRANSACTIVATION BY GPCRS IN CARDIAC HYPERTROPHY            | 0.024523643  | BioCarta | FALSE |
| 10 | DOWNREGULATED OF MTA-3 IN ER-NEGATIVE BREAST TUMORS                             | 0.053349923  | BioCarta | FALSE |
| 11 | FGF SIGNALING PATHWAY                                                           | 0.075131747  | PID      | FALSE |
| 12 | MECHANISM OF PROTEIN IMPORT INTO THE NUCLEUS                                    | 0.08164103   | BioCarta | FALSE |
| 13 | ROLE OF PI3K SUBUNIT P85 IN REGULATION OF ACTIN ORGANIZATION AND CELL MIGRATION | 0.117438736  | BioCarta | FALSE |
| 14 | IL2 SIGNALING EVENTS MEDIATED BY PI3K                                           | 0.168333374  | PID      | FALSE |
| 15 | ROLE OF NICOTINIC ACETYLCHOLINE RECEPTORS IN THE REGULATION OF APOPTOSIS        | 0.174536482  | BioCarta | FALSE |
| 16 | NITROGEN METABOLISM                                                             | 0.183164709  | KEGG     | FALSE |
| 17 | ONE CARBON POOL BY FOLATE                                                       | 0.195622076  | KEGG     | FALSE |
| 18 | EPHA2 FORWARD SIGNALING                                                         | 0.20421591   | PID      | FALSE |
| 19 | S1P5 PATHWAY                                                                    | 0.211230972  | PID      | FALSE |
| 20 | G-PROTEIN SIGNALING THROUGH TUBBY PROTEINS                                      | 0.216111841  | BioCarta | FALSE |
| 21 | CDK REGULATION OF DNA REPLICATION                                               | 0.264061143  | BioCarta | FALSE |
| 22 | CYCLING OF RAN IN NUCLEOCYTOPLASMIC TRANSPORT                                   | 0.283930054  | BioCarta | FALSE |
| 23 | NEPHRIN-NEPH1 SIGNALING IN THE KIDNEY PODOCYTE                                  | 0.298814913  | PID      | FALSE |
| 24 | HYPOXIA-INDUCIBLE FACTOR IN THE CARDIOVASCULAR SYSTEM                           | 0.303271487  | BioCarta | TRUE  |
| 25 | EPHA FORWARD SIGNALING                                                          | 0.313490344  | PID      | FALSE |
| 26 | SYNDECAN-1-MEDIATED SIGNALING EVENTS                                            | 0.318816363  | PID      | FALSE |
| 27 | GALACTOSE METABOLISM                                                            | 0.322466451  | KEGG     | FALSE |
| 28 | WNT SIGNALING NETWORK                                                           | 0.327314283  | PID      | FALSE |
| 29 | SIGNALING EVENTS MEDIATED BY THE HEDGEHOG FAMILY                                | 0.370292759  | PID      | FALSE |
| 30 | OLFACTORY TRANSDUCTION                                                          | 0.432674384  | KEGG     | FALSE |
| 31 | NECTIN ADHESION PATHWAY                                                         | 0.437835458  | PID      | TRUE  |
| 32 | ATYPICAL NF-KAPPAB PATHWAY                                                      | 0.446905522  | PID      | TRUE  |
| 33 | REGULATION OF ANDROGEN RECEPTOR ACTIVITY                                        | 0.517690779  | PID      | FALSE |
| 34 | ERBB RECEPTOR SIGNALING NETWORK                                                 | 0.548526238  | PID      | FALSE |
| 35 | CXCR4 SIGNALING PATHWAY                                                         | 0.562974028  | BioCarta | TRUE  |
| 36 | E-CADHERIN SIGNALING IN KERATINOCYTES                                           | 0.64708616   | PID      | TRUE  |
| 37 | HEDGEHOG SIGNALING EVENTS MEDIATED BY GLI PROTEINS                              | 0.662081488  | PID      | TRUE  |

|    |                                                                  |             |          |       |
|----|------------------------------------------------------------------|-------------|----------|-------|
| 38 | PRION DISEASES                                                   | 0.676095874 | KEGG     | FALSE |
| 39 | ASPIRIN BLOCKS SIGNALING PATHWAY INVOLVED IN PLATELET ACTIVATION | 0.79155655  | BioCarta | FALSE |
| 40 | THE IGF-1 RECEPTOR AND LONGEVITY                                 | 0.805583453 | BioCarta | FALSE |
| 41 | PHENYLALANINE METABOLISM                                         | 0.827221124 | KEGG     | TRUE  |
| 42 | IL2-MEDIATED SIGNALING EVENTS                                    | 0.920700196 | PID      | FALSE |
| 43 | GLYCOSPHINGOLIPID BIOSYNTHESIS - GANGLIO SERIES                  | 0.997329934 | KEGG     | TRUE  |
| 44 | BIOSYNTHESIS OF UNSATURATED FATTY ACIDS                          | 1.059629055 | KEGG     | TRUE  |
| 45 | EPHRIN A REVERSE SIGNALING                                       | 1.060213506 | PID      | TRUE  |
| 46 | CARDIAC PROTECTION AGAINST ROS                                   | 1.111659385 | BioCarta | FALSE |
| 47 | HOW DOES SALMONELLA HIJACK A CELL                                | 1.118940525 | BioCarta | TRUE  |
| 48 | IL-7 SIGNAL TRANSDUCTION                                         | 1.155986994 | BioCarta | TRUE  |
| 49 | PROXIMAL TUBULE BICARBONATE RECLAMATION                          | 1.350203916 | KEGG     | TRUE  |
| 50 | EGFR-DEPENDENT ENDOTHELIN SIGNALING EVENTS                       | 1.382471164 | PID      | TRUE  |
| 51 | PTEN DEPENDENT CELL CYCLE ARREST AND APOPTOSIS                   | 1.417434559 | BioCarta | TRUE  |
| 52 | PHOSPHOLIPASE C DELTA IN PHOSPHOLIPID ASSOCIATED CELL SIGNALING  | 1.576989062 | BioCarta | TRUE  |
| 53 | VALIDATED TRANSCRIPTIONAL TARGETS OF DELTANP63 ISOFORMS          | 1.884449116 | PID      | TRUE  |
| 54 | ERYTHROPOIETIN MEDIATED NEUROPROTECTION THROUGH NF-KB            | 2.560218675 | BioCarta | TRUE  |
| 55 | ER ASSOCIATED DEGRADATION -ERAD- PATHWAY                         | 2.79315365  | BioCart  | TRUE  |

LOOCV, leave-one-out cross validation; LOSOCV, leave-one-study-out cross validation; Coeffs, coefficients.

**Table S4.** The genes that overlap between pathways (overlap counts  $\geq 3$ ).

| No. | Entrezid | HUGO Gene Symbol | Genename                                                                                | Overlap Counts |
|-----|----------|------------------|-----------------------------------------------------------------------------------------|----------------|
| 1   | 5290     | <i>PIK3CA</i>    | phosphatidylinositol-4,5-bisphosphate 3-kinase, catalytic subunit alpha                 | 16             |
| 2   | 5295     | <i>PIK3R1</i>    | phosphoinositide-3-kinase, regulatory subunit 1 (alpha)                                 | 16             |
| 3   | 6714     | <i>SRC</i>       | SRC proto-oncogene, non-receptor tyrosine kinase                                        | 13             |
| 4   | 2885     | <i>GRB2</i>      | growth factor receptor-bound protein 2                                                  | 11             |
| 5   | 207      | <i>AKT1</i>      | v-akt murine thymoma viral oncogene homolog 1                                           | 10             |
| 6   | 2534     | <i>FYN</i>       | FYN proto-oncogene, Src family tyrosine kinase                                          | 10             |
| 7   | 6464     | <i>SHC1</i>      | SHC (Src homology 2 domain containing) transforming protein 1                           | 10             |
| 8   | 5879     | <i>RAC1</i>      | ras-related C3 botulinum toxin substrate 1 (rho family, small GTP binding protein Rac1) | 9              |
| 9   | 6654     | <i>SOS1</i>      | son of sevenless homolog 1 (Drosophila)                                                 | 9              |
| 10  | 3265     | <i>HRAS</i>      | Harvey rat sarcoma viral oncogene homolog                                               | 8              |
| 11  | 387      | <i>RHOA</i>      | ras homolog family member A                                                             | 8              |
| 12  | 3725     | <i>JUN</i>       | jun proto-oncogene                                                                      | 7              |
| 13  | 3932     | <i>LCK</i>       | LCK proto-oncogene, Src family tyrosine kinase                                          | 7              |
| 14  | 5594     | <i>MAPK1</i>     | mitogen-activated protein kinase 1                                                      | 7              |

|    |           |                     |                                                                                          |   |
|----|-----------|---------------------|------------------------------------------------------------------------------------------|---|
| 15 | 5595      | <i>MAPK3</i>        | mitogen-activated protein kinase 3                                                       | 7 |
| 16 | 5335      | <i>PLCG1</i>        | phospholipase C, gamma 1                                                                 | 6 |
| 17 | 5604      | <i>MAP2K1</i>       | mitogen-activated protein kinase kinase 1                                                | 6 |
| 18 | 5747      | <i>PTK2</i>         | protein tyrosine kinase 2                                                                | 6 |
| 19 | 1432      | <i>MAPK14</i>       | mitogen-activated protein kinase 14                                                      | 5 |
| 20 | 2782      | <i>GNB1</i>         | guanine nucleotide binding protein (G protein), beta polypeptide 1                       | 5 |
| 21 | 409       | <i>ARRB2</i>        | arrestin, beta 2                                                                         | 5 |
| 22 | 4609      | <i>MYC</i>          | v-myc avian myelocytomatosis viral oncogene homolog                                      | 5 |
| 23 | 5566      | <i>PRKACA</i>       | protein kinase, cAMP-dependent, catalytic, alpha                                         | 5 |
| 24 | 5599      | <i>MAPK8</i>        | mitogen-activated protein kinase 8                                                       | 5 |
| 25 | 1906      | <i>EDN1</i>         | endothelin 1                                                                             | 4 |
| 26 | 1956      | <i>EGFR</i>         | epidermal growth factor receptor                                                         | 4 |
| 27 | 2033      | <i>EP300</i>        | E1A binding protein p300                                                                 | 4 |
| 28 | 2185      | <i>PTK2B</i>        | protein tyrosine kinase 2 beta                                                           | 4 |
| 29 | 2309      | <i>FOXO3</i>        | forkhead box O3                                                                          | 4 |
| 30 | 2770      | <i>GNAI1</i>        | guanine nucleotide binding protein (G protein), alpha inhibiting activity polypeptide 1  | 4 |
| 31 | 2792      | <i>GNGT1</i>        | guanine nucleotide binding protein (G protein), gamma transducing activity polypeptide 1 | 4 |
| 32 | 2932      | <i>GSK3B</i>        | glycogen synthase kinase 3 beta                                                          | 4 |
| 33 | 3320      | <i>HSP90AA1</i>     | heat shock protein 90kDa alpha (cytosolic), class A member 1                             | 4 |
| 34 | 5605      | <i>MAP2K2</i>       | mitogen-activated protein kinase kinase 2                                                | 4 |
| 35 | 5781      | <i>PTPN11</i>       | protein tyrosine phosphatase, non-receptor type 11                                       | 4 |
| 36 | 5894      | <i>RAF1</i>         | Raf-1 proto-oncogene, serine/threonine kinase                                            | 4 |
| 37 | 596       | <i>BCL2</i>         | B-cell CLL/lymphoma 2                                                                    | 4 |
| 38 | 5970      | <i>RELA</i>         | v-rel avian reticuloendotheliosis viral oncogene homolog A                               | 4 |
| 39 | 6416      | <i>MAP2K4</i>       | mitogen-activated protein kinase kinase 4                                                | 4 |
| 40 | 7015      | <i>TERT</i>         | telomerase reverse transcriptase                                                         | 4 |
| 41 | 9564      | <i>BCAR1</i>        | breast cancer anti-estrogen resistance 1                                                 | 4 |
| 42 | 998       | <i>CDC42</i>        | cell division cycle 42                                                                   | 4 |
| 43 | 999       | <i>CDH1</i>         | cadherin 1, type 1                                                                       | 4 |
| 44 | 100129518 | <i>LOC100129518</i> | uncharacterized LOC100129518                                                             | 3 |
| 45 | 1387      | <i>CREBBP</i>       | CREB binding protein                                                                     | 3 |
| 46 | 142685    | <i>ASB15</i>        | ankyrin repeat and SOCS box containing 15                                                | 3 |
| 47 | 1950      | <i>EGF</i>          | epidermal growth factor                                                                  | 3 |
| 48 | 2268      | <i>FGR</i>          | FGR proto-oncogene, Src family tyrosine kinase                                           | 3 |
| 49 | 2353      | <i>FOS</i>          | FBJ murine osteosarcoma viral oncogene homolog                                           | 3 |
| 50 | 2736      | <i>GLI2</i>         | GLI family zinc finger 2                                                                 | 3 |
| 51 | 3055      | <i>HCK</i>          | HCK proto-oncogene, Src family tyrosine kinase                                           | 3 |
| 52 | 3065      | <i>HDAC1</i>        | histone deacetylase 1                                                                    | 3 |
| 53 | 3561      | <i>IL2RG</i>        | interleukin 2 receptor, gamma                                                            | 3 |
| 54 | 3716      | <i>JAK1</i>         | Janus kinase 1                                                                           | 3 |
| 55 | 3718      | <i>JAK3</i>         | Janus kinase 3                                                                           | 3 |

|    |      |                |                                                                                     |   |
|----|------|----------------|-------------------------------------------------------------------------------------|---|
| 56 | 4067 | <i>LYN</i>     | LYN proto-oncogene, Src family tyrosine kinase                                      | 3 |
| 57 | 4792 | <i>NFKBIA</i>  | nuclear factor of kappa light polypeptide gene enhancer in B-cells inhibitor, alpha | 3 |
| 58 | 5058 | <i>PAK1</i>    | p21 protein (Cdc42/Rac)-activated kinase 1                                          | 3 |
| 59 | 5170 | <i>PDPK1</i>   | 3-phosphoinositide dependent protein kinase 1                                       | 3 |
| 60 | 5567 | <i>PRKACB</i>  | protein kinase, cAMP-dependent, catalytic, beta                                     | 3 |
| 61 | 5568 | <i>PRKACG</i>  | protein kinase, cAMP-dependent, catalytic, gamma                                    | 3 |
| 62 | 5578 | <i>PRKCA</i>   | protein kinase C, alpha                                                             | 3 |
| 63 | 5579 | <i>PRKCB</i>   | protein kinase C, beta                                                              | 3 |
| 64 | 5613 | <i>PRKX</i>    | protein kinase, X-linked                                                            | 3 |
| 65 | 5727 | <i>PTCH1</i>   | patched 1                                                                           | 3 |
| 66 | 6195 | <i>RPS6KA1</i> | ribosomal protein S6 kinase, 90kDa, polypeptide 1                                   | 3 |
| 67 | 640  | <i>BLK</i>     | BLK proto-oncogene, Src family tyrosine kinase                                      | 3 |
| 68 | 6469 | <i>SHH</i>     | sonic hedgehog                                                                      | 3 |
| 69 | 6608 | <i>SMO</i>     | smoothed, frizzled class receptor                                                   | 3 |
| 70 | 6647 | <i>SOD1</i>    | superoxide dismutase 1, soluble                                                     | 3 |
| 71 | 6648 | <i>SOD2</i>    | superoxide dismutase 2, mitochondrial                                               | 3 |
| 72 | 6774 | <i>STAT3</i>   | signal transducer and activator of transcription 3 (acute-phase response factor)    | 3 |
| 73 | 6777 | <i>STAT5B</i>  | signal transducer and activator of transcription 5B                                 | 3 |
| 74 | 7410 | <i>VAV2</i>    | vav 2 guanine nucleotide exchange factor                                            | 3 |
| 75 | 7525 | <i>YES1</i>    | YES proto-oncogene 1, Src family tyrosine kinase                                    | 3 |
| 76 | 8945 | <i>BTRC</i>    | beta-transducin repeat containing E3 ubiquitin protein ligase                       | 3 |
| 77 | 8976 | <i>WASL</i>    | Wiskott-Aldrich syndrome-like                                                       | 3 |

**Table S5.** Performance scores for internal and external validation.

| Internal and External Validation                         | AUROC | BRIER | ACC   | Precision | Recall | F1    | MCC   |
|----------------------------------------------------------|-------|-------|-------|-----------|--------|-------|-------|
| LOSOCV                                                   |       |       |       |           |        |       |       |
| Internal 8 studies cross-study validation                | 0.911 | 0.127 | 0.822 | 0.820     | 0.854  | 0.837 | 0.642 |
| External validation (GSE34228)                           | 1.000 | 0.005 | 1.000 | 1.000     | 1.000  | 1.000 | 1.000 |
| External validation (GSE62061)                           | 1.000 | 0.123 | 0.667 | 0.600     | 1.000  | 0.750 | 0.447 |
| External validation (overall)                            | 1.000 | 0.040 | 0.900 | 0.833     | 1.000  | 0.909 | 0.861 |
| LOOCV                                                    |       |       |       |           |        |       |       |
| Internal 8 studies leave-one-sample-out cross validation | 1.000 | 0.018 | 0.989 | 1.000     | 0.979  | 0.989 | 0.978 |
| External validation (GSE34228)                           | 1.000 | 0.000 | 1.000 | 1.000     | 1.000  | 1.000 | 1.000 |
| External validation (GSE62061)                           | 1.000 | 0.083 | 0.833 | 0.750     | 1.000  | 0.857 | 0.707 |
| External validation (overall)                            | 1.000 | 0.025 | 0.950 | 0.909     | 1.000  | 0.952 | 0.905 |

LOSOCV, leave-one-study-out cross validation; LOOCV, leave-one-out cross validation; AUROC, area under curve of receiver operating characteristic; ACC, accuracy; MCC, Matthews correlation coefficient.

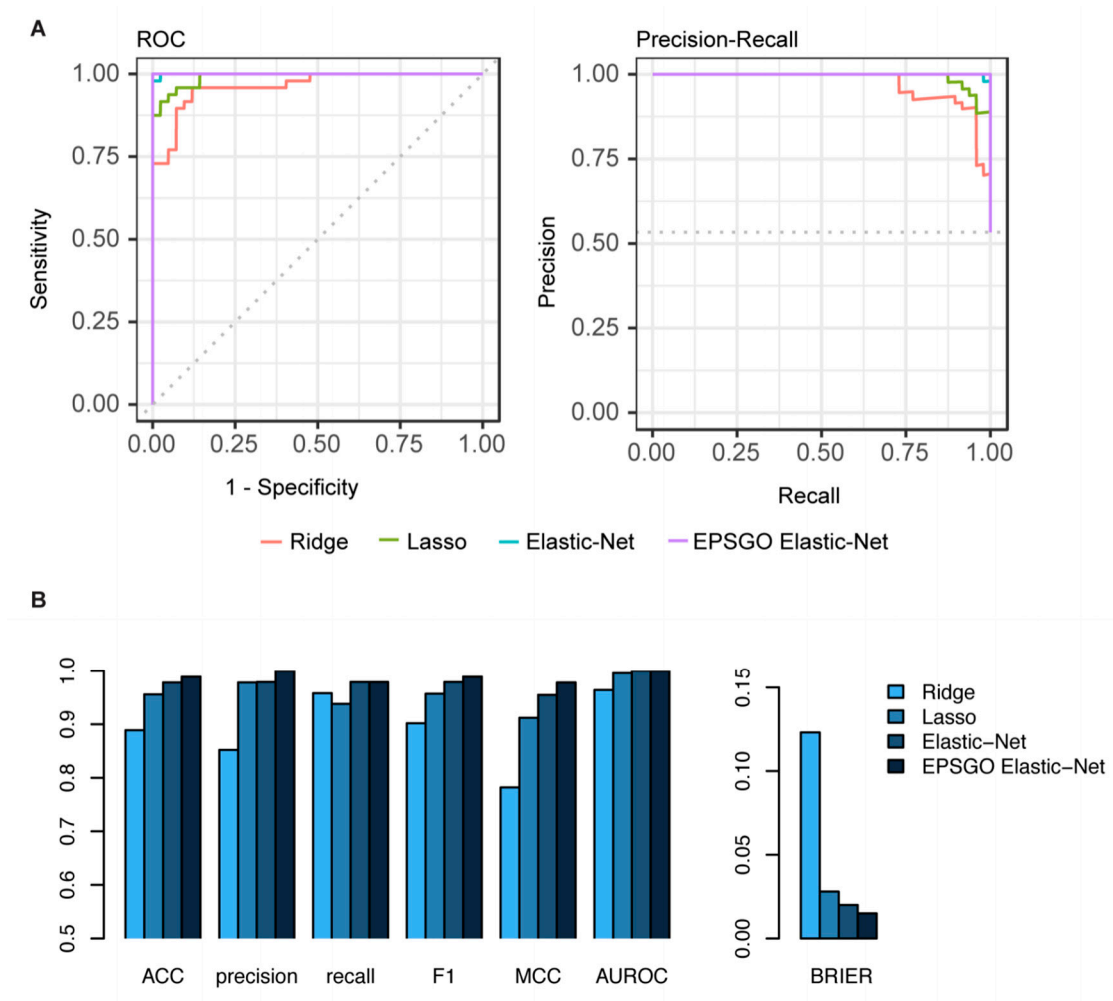

**Figure S1.** Performance comparison of the four classifiers including ridge, lasso, elastic net and EPSGO-Elastic net on the merged cohort. **(A)**, Receiver operating characteristic (ROC) and Precision-Recall curves of four classifiers. **(B)**, Different performance metrics for the evaluation of classification. EPSGO, Efficient Parameter Selection via Global Optimization; AUROC, area under curve of receiver operating characteristic; ACC, accuracy; MCC, Matthews correlation coefficient.

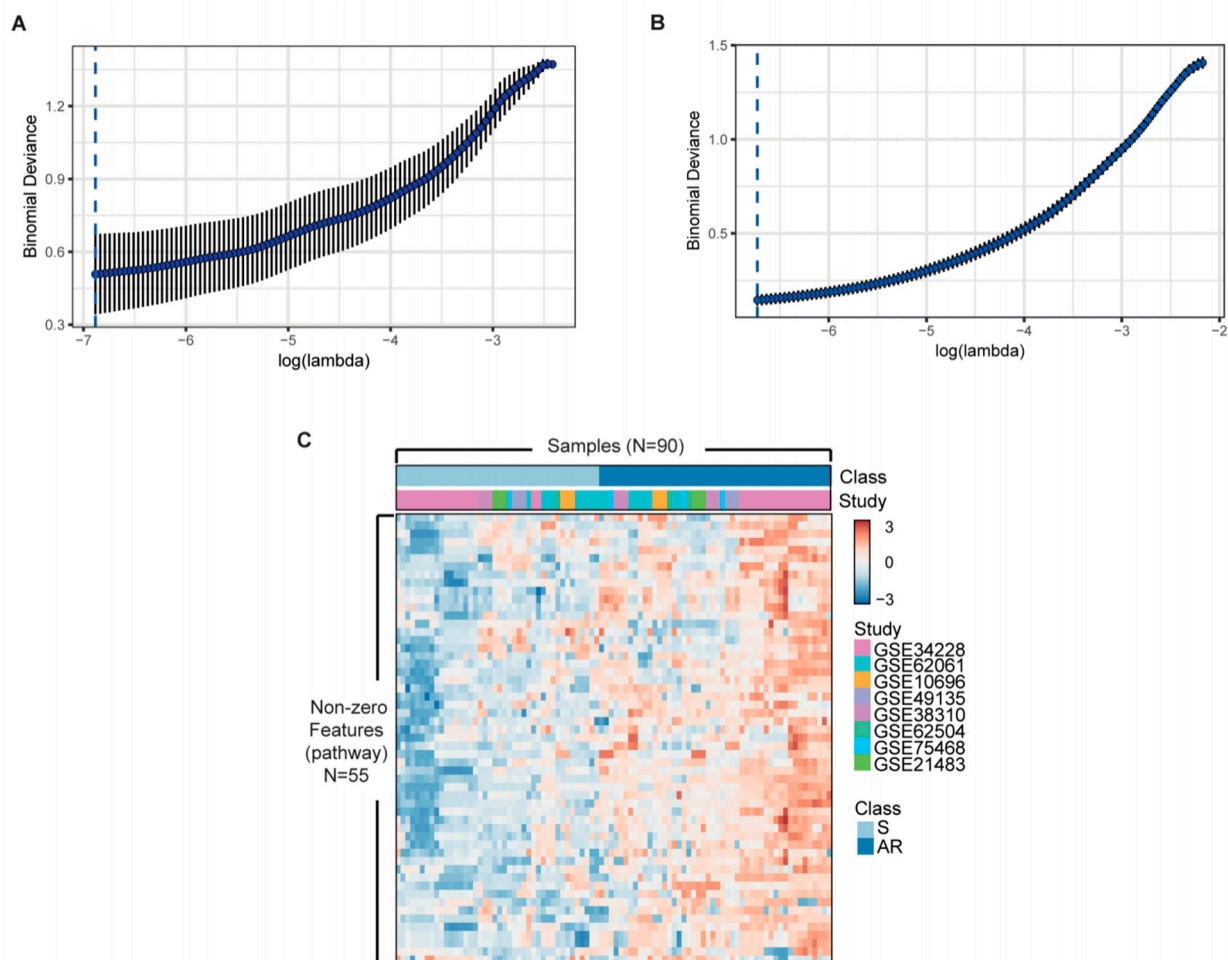

**Figure S2.** Log loss as a function of the regularization hyper-parameter  $\lambda$  for LOSOCV (A) and LOOCV (B) on the merged cohort. Points and error bars correspond to the mean and the standard deviation respectively. The dashed lines indicate the final  $\lambda$  solution where the minimum deviance + 1SE was recorded. (C), meta-analysis-derived Elastic Net with LOOCV. The heatmap shows the pathways with non-zero coefficient. AR, acquired resistance; S, sensitive; LOSOCV, leave-one-study-out cross validation; LOOCV, leave-one-out cross validation.

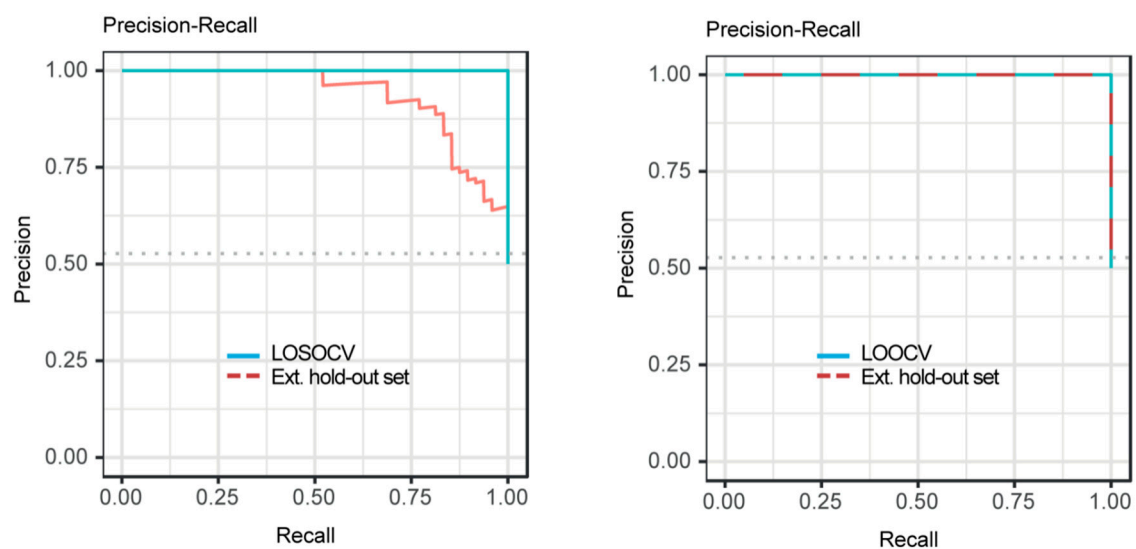

**Figure S3.** Precision-Recall curves for the binary classifiers ability to distinguish sensitive and acquired resistance to EGFR TKIs in the internal leave-one-study-out (left) or leave-one-sample-out (right) CV (green) and external test set (red).



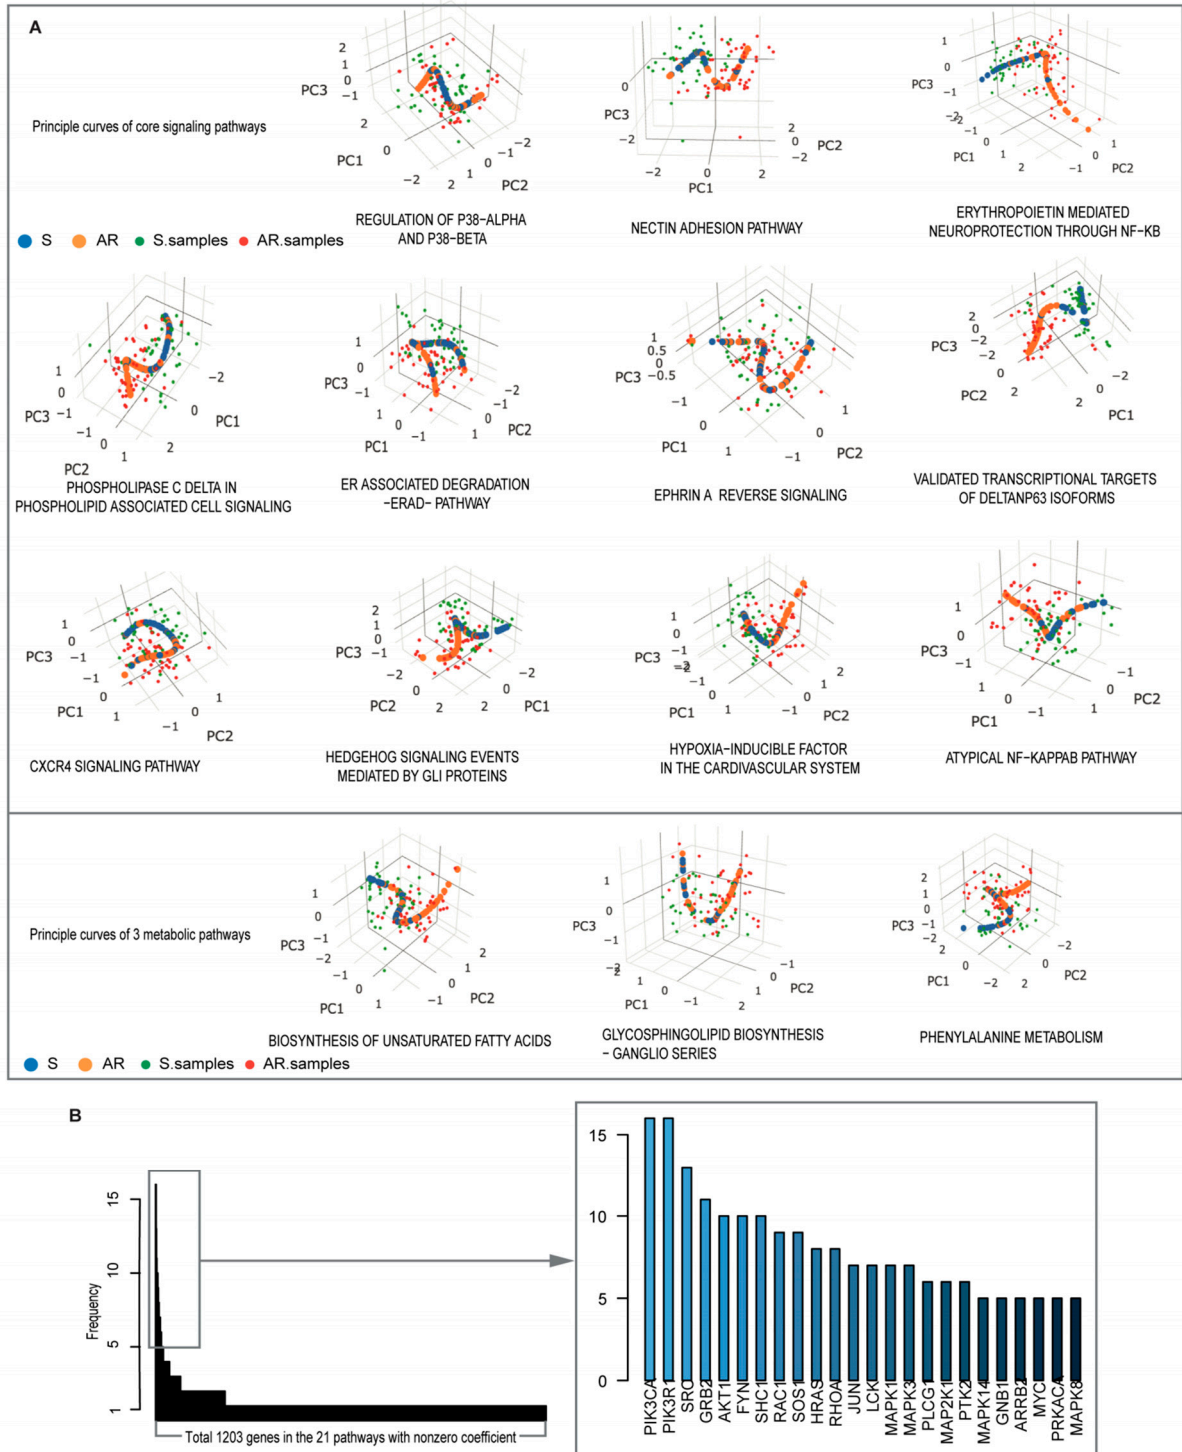

**Figure S4.** (A), additional principal curves of selected pathways. (B), overlapping gene count in the 752 pathways listed (left) and genes shared in more than 5 pathways (right).

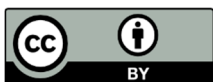

Supplement: cancers-11-00045-s001.pdf [file cancers-11-00045-s001.pdf]
